# Supplementary material for: Right Ventricular Outflow Doppler Predicts Low Cardiac Index in Intermediate Risk Pulmonary Embolism
Source: PubMed Central journal article supplement — Clin Appl Thromb Hemost. 2019 Nov 13;25:1076029619886062. doi: 10.1177/1076029619886062 (PMC7019409; doi:10.1177/1076029619886062), 2019-11-13

## Supplemental Figure Legends

**Figure 1A.** Kaplan Meier Curve of all-cause mortality. (p=0.186)

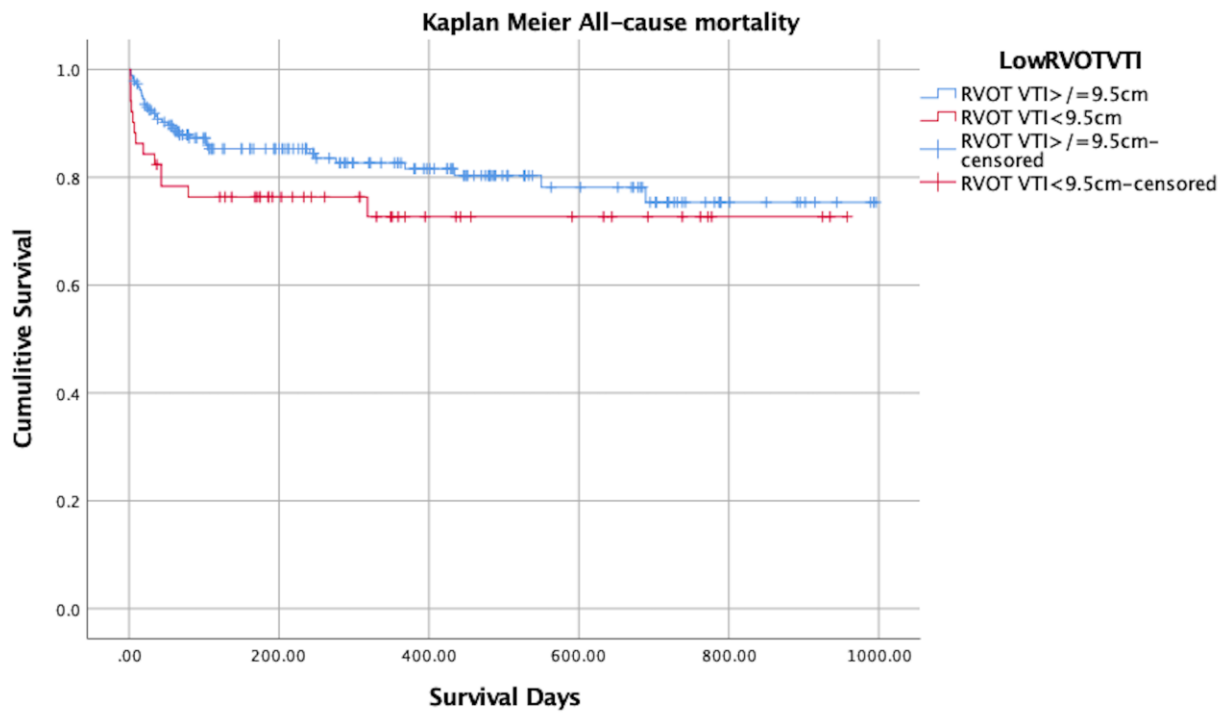

**Figure 2A:** RVOT VTI distribution among the PE severity subgroups. Low Risk, Intermediate Risk, High Risk

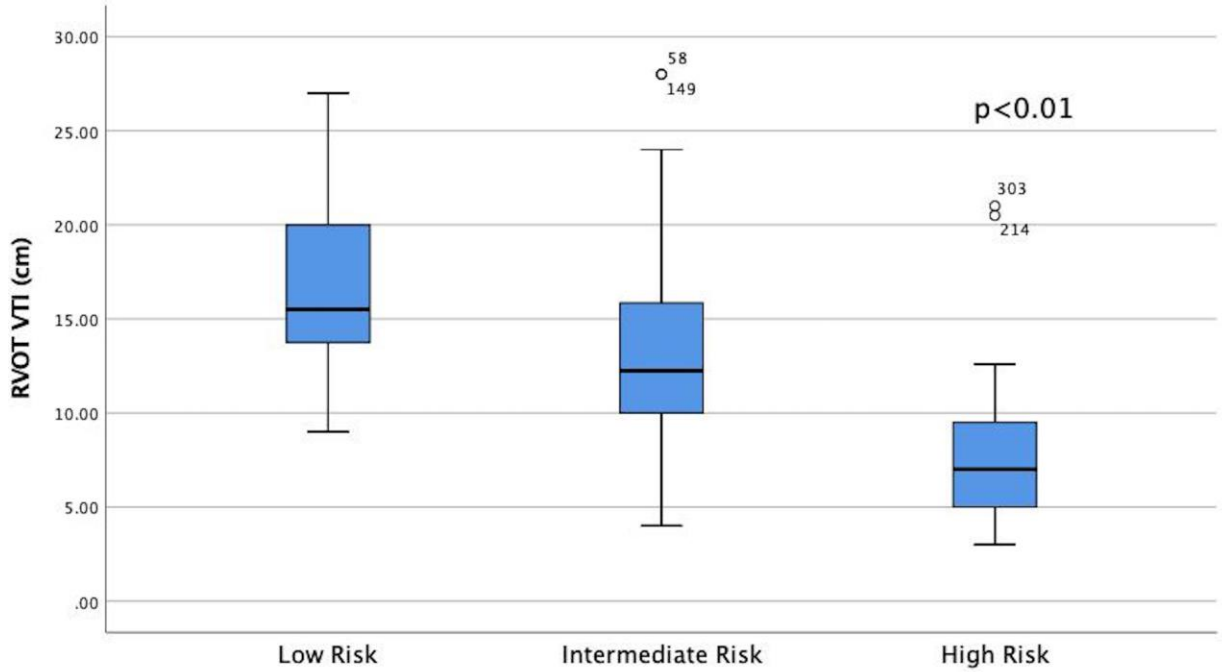

**Figure 3A.**

Receiver Operating Characteristic (ROC) curve for LVOT VTI for the diagnosis of low cardiac index ( $CI < 2.2 \text{ L/min/m}^2$ ). Area under the curve (AUC) is 0.73 (95% CI 0.6-0.9),  $p=0.02$ , Cut off LVOT VTI of 18.3cm provides sensitivity of 50% and specificity 88%.

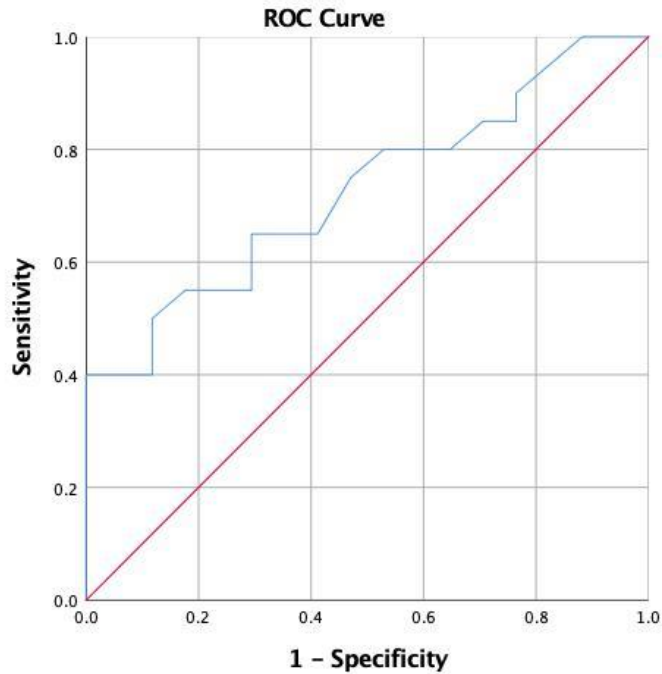

Supplement: Supplemental_Figure_Legend.pdf [file Supplemental_Figure_Legend.pdf]
