# Supplementary material for: Right Ventricular Outflow Doppler Predicts Low Cardiac Index in Intermediate Risk Pulmonary Embolism
Source: PubMed Central journal article supplement — Clin Appl Thromb Hemost. 2019 Nov 13;25:1076029619886062. doi: 10.1177/1076029619886062 (PMC7019409; doi:10.1177/1076029619886062), 2019-11-13
Supplement: Supplemmentary_table_1A_Sensitivity_analysis.pdf [file Supplemmentary_table_1A_Sensitivity_analysis.pdf]

**Table 1A. Univariable and multivariable linear regression model to identify predictors of cardiac index. Multivariable model includes LVOT VTI.**

| <b>Risk Factor</b> | <b>Unadjusted Beta<br/>coefficient (95% CI)</b> | <b>P value</b> | <b>Adjusted Beta<br/>coefficient (95% CI)</b> | <b>P value</b> |
|--------------------|-------------------------------------------------|----------------|-----------------------------------------------|----------------|
| LVOT VTI           | 0.09 (0.06-0.19)                                | 0.003          | 0.05 (-0.05 - 0.16)                           | 0.29           |
| RV/LV ratio        | -0.98 (-1.73- -0.22)                            | 0.01           | -0.84 (-1.8 – 0.09)                           | 0.07           |
| IVC diameter       | -0.05 (-0.11- -0.001)                           | 0.05           | -0.02 (-0.09 - 0.05)                          | 0.49           |
| S'                 | 0.06 (-0.01- 0.14)                              | 0.08           | 0.03 (-0.08 - 0.14)                           | 0.53           |
| PASP               | -0.02 (-0.03- -0.002)                           | 0.03           | -0.01 (-0.04 – 0.01)                          | 0.28           |
